# Supplementary material for: Role of spacer lengths of gemini surfactants in the synthesis of silver nanorods in micellar media
Source: Royal Society of Chemistry journal article supplement (doi:10.1039/c1nr10141b), 2011-01-01
Supplement: c1nr10141b.pdf [file c1nr10141b.pdf]

## Supporting Information

### Role of Spacer lengths of Gemini Surfactants in the Synthesis of Silver nanorods in Micellar media

Santanu Bhattacharya<sup>\*,a,b,c</sup> and Joydeep Biswas<sup>a</sup>

<sup>a</sup>*Department of Organic Chemistry, Indian Institute of Science, Bangalore 560 012, India,*

<sup>b</sup>*Chemical Biology Unit of JNCASR, Bangalore 560 064, India,*

<sup>c</sup>*J. C. Bose Fellow, DST, New Delhi, India.*

\*Corresponding author. Email: [sb@orgchem.iisc.ernet.in](mailto:sb@orgchem.iisc.ernet.in)

Phone: (91)-80-2293-2664; Fax: (91)-80-2360-0529.

| <b>Contents</b>                                                                        | <b>Page No.</b> |
|----------------------------------------------------------------------------------------|-----------------|
| TEM images Ag-nanospecies stabilized by gemini surfactants 16-5-16 and 16-12-16        | S2              |
| Characteristics of the Ag-nanorods stabilized by gemini surfactant micelles (Table S1) | S3              |
| EDAX analyses                                                                          | S4              |

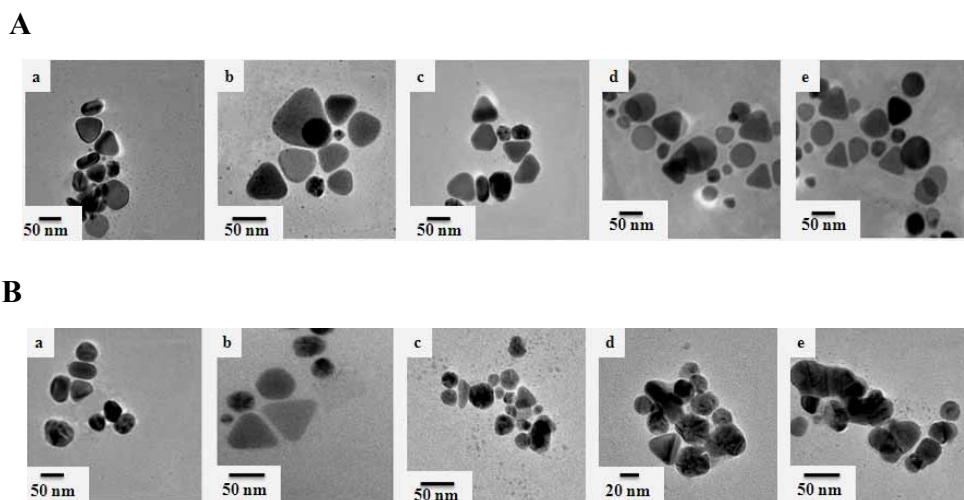

**Figure S1.** Transmission electron micrographs of the Ag-nanospecies stabilized by gemini surfactants **(A)** 16-5-16 and **(B)** 16-12-16 when decreasing amounts of Ag-nanoseed solutions were added (a = 200  $\mu$ L, b = 100  $\mu$ L, c = 50  $\mu$ L, d = 25  $\mu$ L and e = 12.5  $\mu$ L).

**Table S1.** Characteristics of the Ag-nanorods stabilized by gemini surfactant micelles (16-2-16 and 16-4-16) with decreasing amounts of Ag-nanoseed solution added.

| <b>Gemini surfactant</b> | <b>Final conc. of gemini surfactant (mM)</b> | <b>Amount of Ag-nanoseed solution<sup>a</sup> added (<math>\mu</math>L)</b> | <b>Aspect Ratio<sup>b</sup></b> | <b><math>\lambda_{\max}</math> (nm)<sup>c</sup></b> |
|--------------------------|----------------------------------------------|-----------------------------------------------------------------------------|---------------------------------|-----------------------------------------------------|
| <b>16-2-16</b>           | 0.78                                         | 200                                                                         | $1.5 \pm 0.3$                   | 410                                                 |
|                          | 0.84                                         | 100                                                                         | $2.6 \pm 0.2$                   | 444                                                 |
|                          | 0.88                                         | 50                                                                          | $3.1 \pm 0.2$                   | 471                                                 |
|                          | 0.9                                          | 25                                                                          | $3.4 \pm 0.2$                   | 506                                                 |
|                          | 0.91                                         | 12.5                                                                        | $3.9 \pm 0.1$                   | 552                                                 |
| <b>16-4-16</b>           | 0.78                                         | 200                                                                         | $2.6 \pm 0.3$                   | 474                                                 |
|                          | 0.84                                         | 100                                                                         | $2.8 \pm 0.1$                   | 504                                                 |
|                          | 0.88                                         | 50                                                                          | $3.7 \pm 0.4$                   | 533                                                 |
|                          | 0.9                                          | 25                                                                          | $4.5 \pm 0.5$                   | 569                                                 |
|                          | 0.91                                         | 12.5                                                                        | $5.5 \pm 0.4$                   | 605                                                 |

<sup>a</sup>Obtained upon stirring with aqueous solutions of AgNO<sub>3</sub>, trisodium citrate and NaBH<sub>4</sub> at room temperature. <sup>b</sup>Based on the TEM imaging. <sup>c</sup>Surface plasmon band maximum as determined from the UV-Vis absorption spectra.

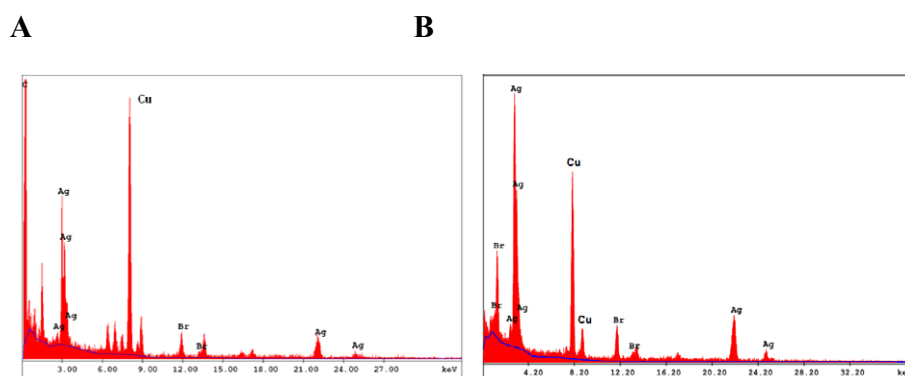

**Figure S2.** EDAX analyses of Ag-nanorods stabilized by gemini surfactants **(A)** 16-2-16 and **(B)** 16-4-16, when 25  $\mu\text{L}$  of Ag-nanoseed solution was added.
